# Supplementary material for: Size and Flexibility Define the Inhibition of the H3N2 Influenza Endonuclease Enzyme by Calix[n]arenes
Source: MDPI journal article supplement (doi:10.3390/antibiotics8020073), 2019-06-03
Supplement: s1 [file s1]

## Supplementary Information

# Size and Flexibility Define the Inhibition of the H3N2 Influenza Endonuclease Enzyme by Calix[n]arenes

Yannick Tauran <sup>1,2,\*</sup>, Jose Pedro Cerón-Carrasco <sup>3</sup>, Moez Rhimi <sup>4</sup>, Florent Perret <sup>5</sup>, Beomjoon Kim <sup>2,6</sup>, Dominique Collard <sup>7</sup>, Anthony W. Coleman <sup>1</sup> and Horacio Pérez-Sánchez <sup>3,\*</sup>

<sup>1</sup> LMI CNRS UMR 5615, Université Lyon 1, Villeurbanne, 69622, France; anthony.coleman@univ-lyon1.fr

<sup>2</sup> LIMMS/CNRS-IIS UMI 2820, Institute of Industrial Science, The University of Tokyo, Tokyo, 153-8505, Japan; bjoonkim@iis.u-tokyo.ac.jp

<sup>3</sup> Bioinformatics and High Performance Computing (BIO-HPC) Research Group, Universidad Católica de Murcia (UCAM), Murcia 30107, Spain; hperez@ucam.edu

<sup>4</sup> INRA, UMR 1319 Micalis, F-78350 Jouy-en-Josas, France; moez.rhimi@jouy.inra.fr

<sup>5</sup> ICBMS, CNRS UMR, Université Lyon 1, Villeurbanne, 69622, France; florent.perret@univ-lyon1.fr

<sup>6</sup> CIRMM, Institute of Industrial Science, University of Tokyo, Tokyo, Japan

<sup>7</sup> Univ. Lille, CNRS, Centrale Lille, ISEN, Univ. Valenciennes, UMR 8520 - IEMN, Lille, F59000, France; collard@iis.u-tokyo.ac.jp

\* Correspondence: yannick.tauran@univ-lyon1.fr (Y.T.); hperez@ucam.edu (H.P.-S.); Tel: +81-3-5841-7073 (Y.T.); Tel.: +34-968-278819 (H.P.-S).

---

## Supplementary Materials:

**Figure S1:** Coomassie-stained gel SDS-PAGE of the PA protein purified from bacterial extract. Molecular weight (MW) ladder (kDa) is shown on the right.

**Figure S2:** Agarose gel electrophoresis shows the digestion activity of PA endonuclease protein. A concentration range of PA endonuclease protein has been mixed with  $\lambda$ -DNA phage. Molecular weight (MW) ladder (1kb) is shown on the right. Reaction products were run in a 0.6 % agarose gel stained with Ethidium Bromide.

**Figure S3.** IC50 determination of H3N2 influenza PA endonuclease at 6.4  $\mu$ M of SC8a on PA endonuclease. '+' means DNA and '-' corresponds to DNA and PA endonuclease.

**Figure S4.** IC50 determination of H3N2 influenza PA endonuclease at 14  $\mu$ M of SC8b on PA endonuclease. '+' means DNA and '-' corresponds to DNA and PA endonuclease.

**Figure S5.** IC50 determination of H3N2 influenza PA endonuclease at 18.7  $\mu$ M of SC8c on PA endonuclease. '+' means DNA and '-' corresponds to DNA and PA endonuclease.

**Figure S6.** IC50 determination of H3N2 influenza PA endonuclease at 11.2  $\mu$ M of SC6a on PA endonuclease. '+' means DNA and '-' corresponds to DNA and PA endonuclease.

**Figure S7:** Histogram obtained from blind docking results. Estimated binding energy in Kcal/mol is shown on X-axis, while the number of poses or occurrences with binding energy values corresponding to a given interval is shown on Y axis.

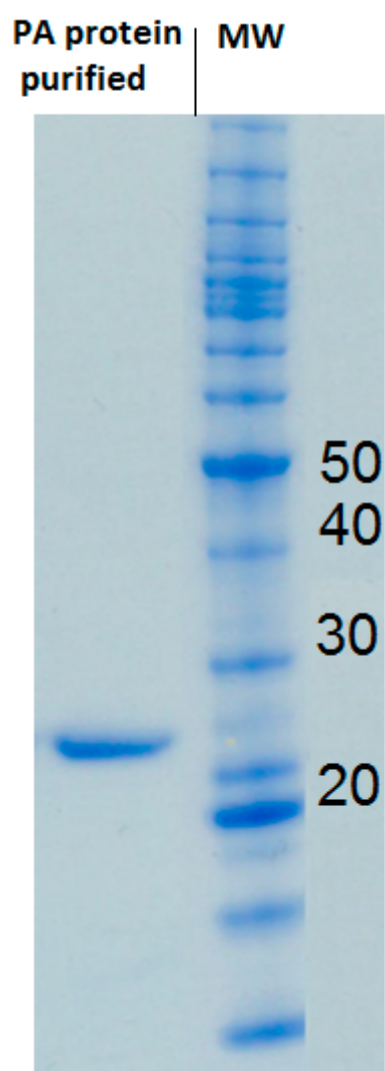

**Figure S1.** Coomassie-stained gel SDS-PAGE of the PA protein purified from bacterial extract. Molecular weight (MW) ladder (kDa) is shown on the right.

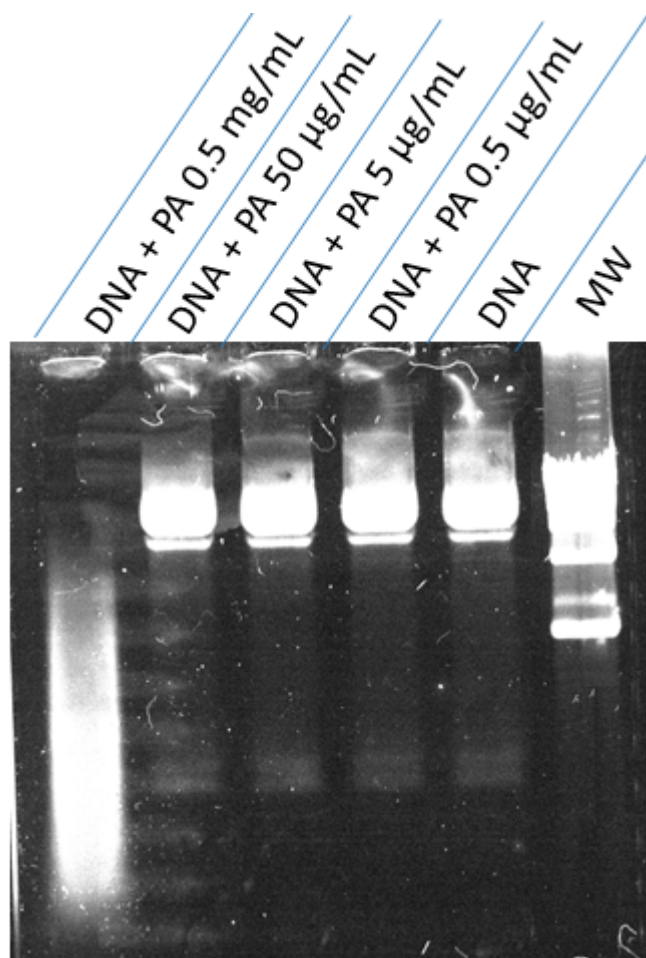

**Figure S2.** Agarose gel electrophoresis shows the digestion activity of PA endonuclease protein. A concentration range of PA endonuclease protein has been mixed with  $\lambda$ -DNA phage. Molecular weight (MW) ladder (1kb) is shown on the right. Reaction products were run in a 0.6 % agarose gel stained with Ethidium Bromide.

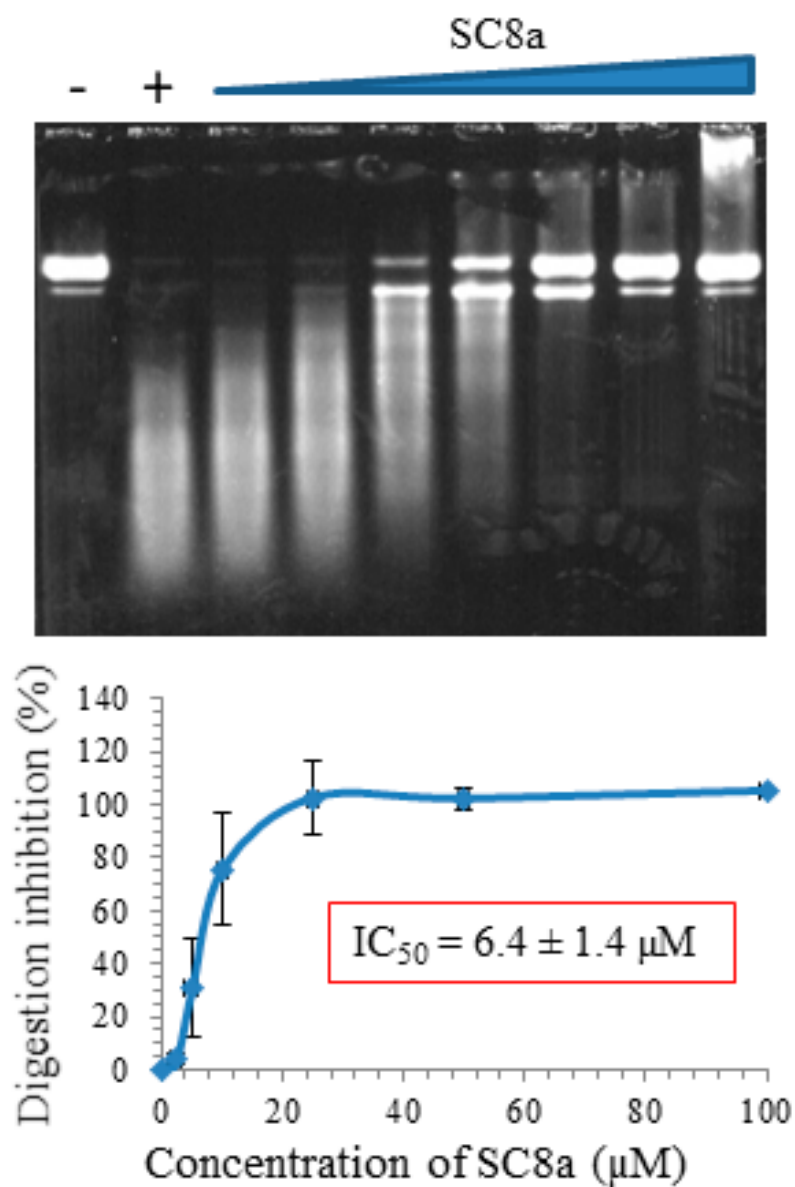

**Figure S3.**  $\text{IC}_{50}$  determination of H3N2 influenza PA endonuclease at  $6.4 \mu\text{M}$  of SC8a on PA endonuclease. '+' means DNA and '-' corresponds to DNA and PA endonuclease.

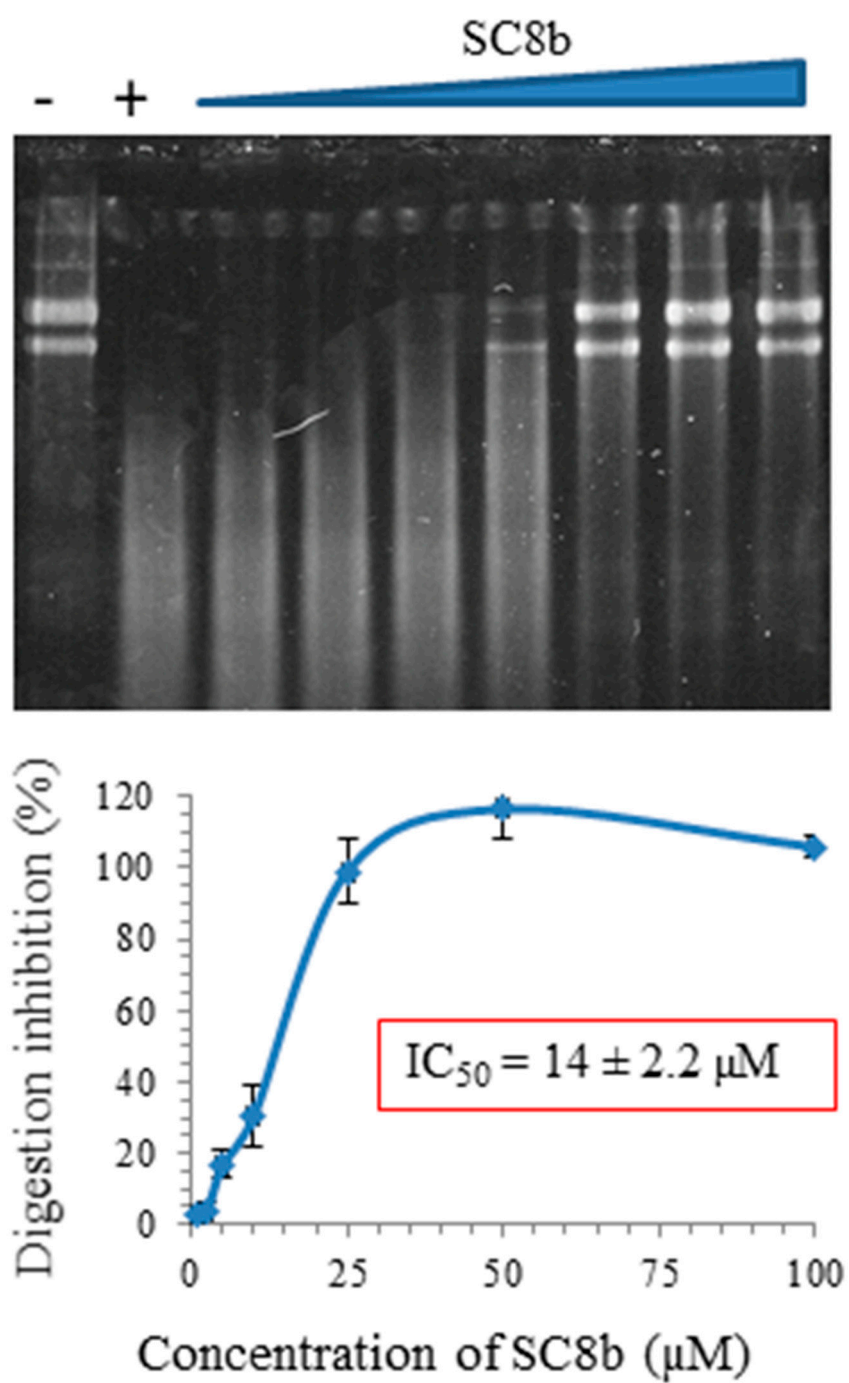

**Figure S4.** IC<sub>50</sub> determination of H3N2 influenza PA endonuclease at 14 μM of SC8b on PA endonuclease. '+' means DNA and '-' corresponds to DNA and PA endonuclease.

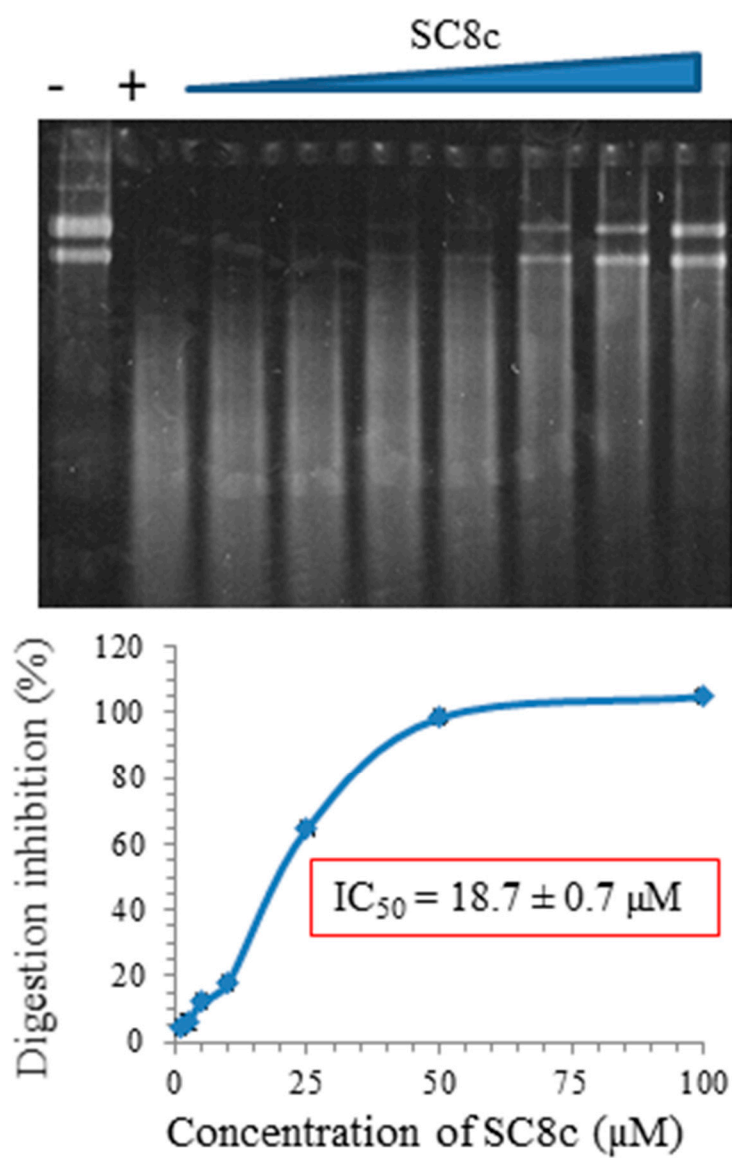

**Figure S5.** IC<sub>50</sub> determination of H3N2 influenza PA endonuclease at 18.7 μM of SC8c on PA endonuclease. '+' means DNA and '-' corresponds to DNA and PA endonuclease.

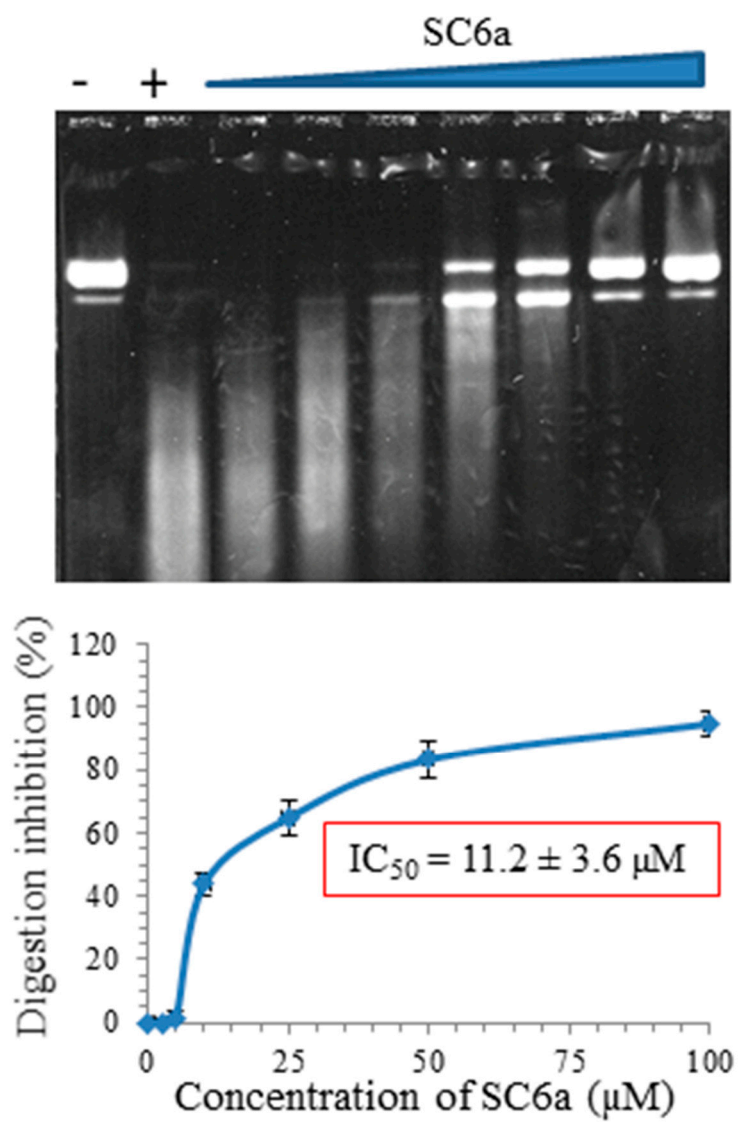

**Figure S6.** IC<sub>50</sub> determination of H3N2 influenza PA endonuclease at 11.2 µM of SC6a on PA endonuclease. '+' means DNA and '-' corresponds to DNA and PA endonuclease.

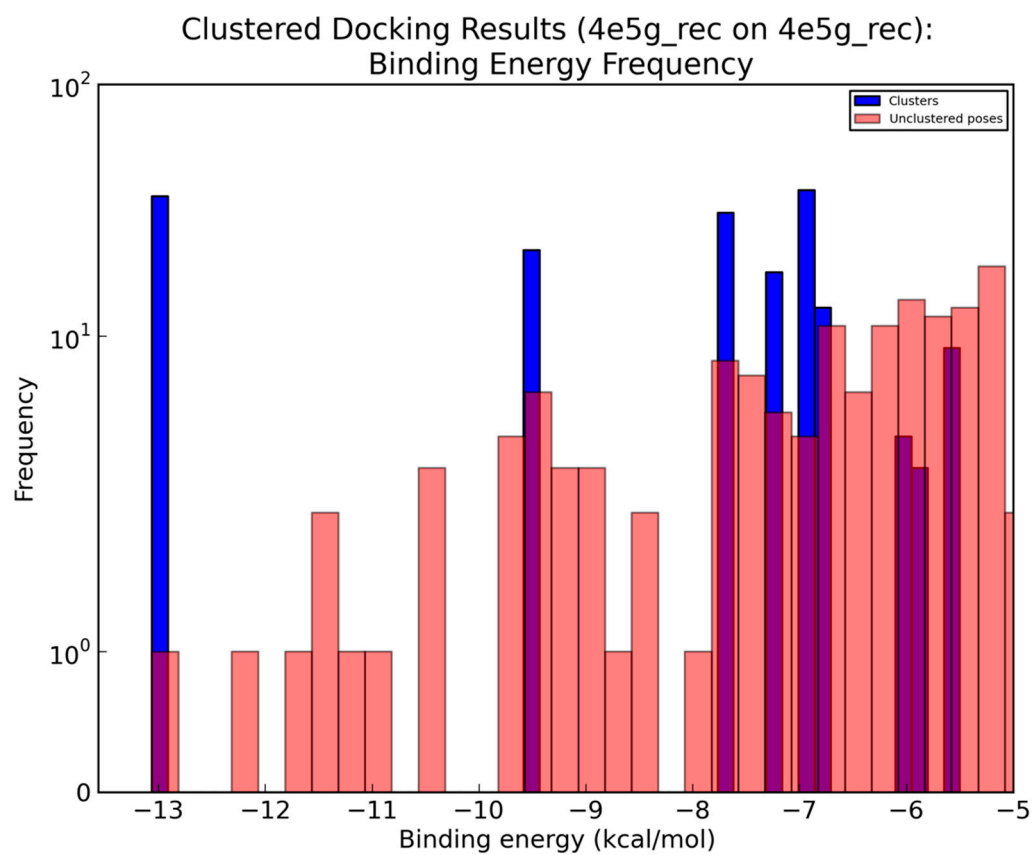

**Figure S7.** Histogram obtained from blind docking results. Estimated binding energy in Kcal/mol is shown on X-axis, while the number of poses or occurrences with binding energy values corresponding to a given interval is shown on Y axis.

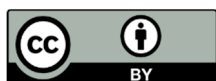

© 2019 by the authors. Submitted for possible open access publication under the terms and conditions of the Creative Commons Attribution (CC BY) license (<http://creativecommons.org/licenses/by/4.0/>).
